# Supplementary material for: What #theDress reveals about the role of illumination priors in color perception and color constancy
Source: PubMed Central journal article supplement — J Vis. Author manuscript; Available in PMC 2018 Feb 14. (PMC5812438; doi:10.1167/17.9.4), 2017-08-01
Supplement: NIHMS76109-supplement-Supplementary_Material.pdf [file NIHMS76109-supplement-Supplementary_Material.pdf]

1 **Aston & Hurlbert - What #theDress reveals about the role of illumination priors in colour**  
 2 **perception and colour constancy, Supplementary Material**

3 **Categorisation of colour names**

4 Table 1 shows the colour names that participants reported for the dress photograph the first time  
 5 they saw it and the categorisation of these colour names into original dress colour name groups. The  
 6 colour names reported by the participants were categorised independently by four members of the  
 7 Hurlbert Colour Vision Laboratories at Newcastle University. The categorisations of all four lab  
 8 members agreed.

9 *Table 1: Categorisation of the colour names that participants reported for the dress photograph the first time*  
 10 *they saw it. The original dress names column shows the colour names as reported by the participant. The*  
 11 *categorised column shows the categorisation of these colour names.*

| <i>Participant ID</i> | <i>Original Dress Names (Body/Lace)</i> | <i>Categorised (Body/Lace)</i> |
|-----------------------|-----------------------------------------|--------------------------------|
| 2000                  | white/gold                              | white/gold                     |
| 2001                  | blue/black                              | blue/black                     |
| 2002                  | blue/gold                               | blue/gold                      |
| 2003                  | blue/black                              | blue/black                     |
| 2005                  | blue/black                              | blue/black                     |
| 2009                  | blue/black                              | blue/black                     |
| 2021                  | white/gold                              | white/gold                     |
| 2022                  | blue/(black/brown)                      | blue/black                     |
| 2023                  | white/gold                              | white/gold                     |
| 2024                  | white/gold                              | white/gold                     |
| 2031                  | white/gold                              | white/gold                     |
| 2033                  | blue/black                              | blue/black                     |
| 2034                  | blue/black                              | blue/black                     |
| 2039                  | blue/black                              | blue/black                     |
| 2040                  | white/gold                              | white/gold                     |
| 2041                  | blue/gold                               | blue/gold                      |
| 2044                  | blue/gold                               | blue/gold                      |
| 2045                  | blue/black                              | blue/black                     |
| 2046                  | blue/black                              | blue/black                     |
| 2047                  | white/gold (yellow)                     | white/gold                     |
| 2049                  | blue/gold                               | blue/gold                      |
| 2050                  | white/metallic gold                     | white/gold                     |
| 2051                  | grey blue/gold                          | blue/gold                      |
| 2052                  | light blue/chocolate brown              | blue/gold                      |
| 2053                  | blue/black                              | blue/black                     |
| 2057                  | blue/black                              | blue/black                     |
| 2059                  | blue/gold                               | blue/gold                      |
| 2061                  | blue/gold                               | blue/gold                      |
| 2062                  | white/gold                              | white/gold                     |
| 2063                  | blue/black                              | blue/black                     |
| 2064                  | white/gold                              | white/gold                     |
| 2065                  | white/gold                              | white/gold                     |

12

13 Table 2 shows the colour names that participants reported for their matches to the dress body and  
 14 lace when presented in isolation. As with the original dress colour names, four members of the  
 15 laboratory independently categorised these data into groups. In 29 out of the 32 cases, all four  
 16 experimenters agreed. In two cases (participants 2050 and 2053), there was a 50/50 split in the  
 17 categorisation (2050: blue/gold vs. white/gold; 2053: blue/black vs. blue/white). Here, the  
 18 categorisation of the most experienced researcher was favoured. Similarly, for one participant  
 19 (2009) all categorisations disagreed (white/gold vs. blue/green vs. purple/green vs. blue/gold).  
 20 Again, the categorisation of the most experienced researcher was favoured.

21 *Table 2: Categorisation of the colour names that participants reported for their matches to the dress body and*  
 22 *lace when presented in isolation. The disk names column shows the colour names as reported by the*  
 23 *participant. The categorised column shows the categorisation of these colour names.*

| <i>Participant ID</i> | <i>Disk Names (Body/Lace)</i>                                                             | <i>Categorised (Body/Lace)</i> |
|-----------------------|-------------------------------------------------------------------------------------------|--------------------------------|
| 2000                  | lavender/bronze                                                                           | purple/gold                    |
| 2001                  | purpley blue/brown                                                                        | blue/gold                      |
| 2002                  | blue/gold                                                                                 | blue/gold                      |
| 2003                  | sky blue/dark grey brown                                                                  | blue/gold                      |
| 2005                  | blue/black                                                                                | blue/black                     |
| 2009                  | light grey with tiny hint of blue and a<br>breath of lilac/greeny mustard<br>yellow ochre | white/gold                     |
| 2021                  | lilac/fawn                                                                                | purple/gold                    |
| 2022                  | blue/brown                                                                                | blue/gold                      |
| 2023                  | very pale grey blue/dirty brown gold                                                      | blue/gold                      |
| 2024                  | white/gold                                                                                | white/gold                     |
| 2031                  | blue/brown                                                                                | blue/gold                      |
| 2033                  | blue/black                                                                                | blue/black                     |
| 2034                  | pastel blue/reddy brown                                                                   | blue/gold                      |
| 2039                  | blue/green                                                                                | blue/green                     |
| 2040                  | pale blue/muddy yellow                                                                    | blue/gold                      |
| 2041                  | light blue/orangy brown                                                                   | blue/gold                      |
| 2044                  | blueish grey/sandy burnt<br>yellow/gold                                                   | blue/gold                      |
| 2045                  | duck egg/mustard                                                                          | blue/gold                      |
| 2046                  | lilac/khaki                                                                               | purple/gold                    |
| 2047                  | white/dark yellow                                                                         | white/gold                     |
| 2049                  | pale violet/fleshy tan                                                                    | purple/gold                    |
| 2050                  | grey bluey white/yellow                                                                   | blue/gold                      |
| 2051                  | grey blue/sandy orange                                                                    | blue/gold                      |
| 2052                  | light blue/dark orange                                                                    | blue/gold                      |
| 2053                  | blue/grey                                                                                 | blue/black                     |
| 2057                  | blue/purple                                                                               | blue/purple                    |
| 2059                  | pale blue/mustard yellow                                                                  | blue/gold                      |
| 2061                  | light blue/gold                                                                           | blue/gold                      |
| 2062                  | blue/black                                                                                | blue/black                     |
| 2063                  | light grey/mustard                                                                        | white/gold                     |
| 2064                  | white/thorn                                                                               | white/gold                     |
| 2065                  | purple/mustard                                                                            | purple/gold                    |

## 24 ANOVA analyses of dress body and lace colour matches

25 With dress body matches grouped according to original dress colour names (B/K, W/G, B/G), there is  
 26 no difference across groups on the lightness ( $L^*$ ) or blue-yellow ( $v^*$ ) axes ( $F(2,29) = 2.66, p =$   
 27  $0.087$  and  $F(2,29) = 1.73, p = 0.196$ ). There was a difference along the red-green dimension ( $u^*$ :  
 28  $F(2,29) = 5.42, p = 0.01$ ), with the B/K group matching the dress body to significantly lower  $u^*$   
 29 values (more green) than the W/G group (mean difference of 6.97,  $p = 0.01$ , Bonferroni corrected).  
 30 However, the same grouping for dress lace matches results in significant differences along all axes of  
 31 CIELUV colour space ( $L^*, u^*$  and  $v^*$ :  $F(2,29) = 8.03, p = 0.002$ ;  $F(2,29) = 13.21, p < 0.001$  and  
 32  $F(2,29) = 6.42, p = 0.005$ ).

33 With dress body matches grouped according to disk colour names (B/K, W/G, B/G, P/G) there are  
 34 significant differences along  $L^*$  ( $F(3,26) = 6.32, p = 0.002$ ) and  $v^*$  ( $F(3,26) = 7.56, p = 0.001$ ).  
 35 Matches did not vary along the  $u^*$  dimension ( $F(3,26) = 2.47, p = 0.084$ ). Matches to the dress  
 36 lace also differ significantly between disk colour names groups on the  $v^*$  ( $F(3,26) = 6.16, p =$   
 37  $0.003$ ) and  $u^*$  axes ( $F(3,26) = 3.73, p = 0.024$ ). Dress lace matches did not differ across disk colour  
 38 name groups on the  $L^*$  axis ( $F(3,26) = 2.41, p = 0.09$ ).

## 39 Control experiment: achromatic matches at different luminance levels

### 40 *Methods*

41 Seven participants from the main experiment returned to the laboratory at a later date to complete  
 42 a control experiment. The main purpose of the control experiment was to ascertain whether the  
 43 fixed luminance setting of the matching disk affects the chromaticity of the achromatic settings. In  
 44 particular, we asked if an increased luminance level leads to a bluer achromatic setting by requiring  
 45 that all participants adjusted the matching disk to look achromatic at each of five different fixed  
 46 luminance levels ( $7.35 \text{ cd/m}^2$ ,  $18.20 \text{ cd/m}^2$ ,  $34.46 \text{ cd/m}^2$ ,  $54.78 \text{ cd/m}^2$  and  $96.49 \text{ cd/m}^2$ ;  
 47 equivalent to the minimum, lower quartile, median, upper quartile and maximum luminance  
 48 settings of the dress body matches from the main experiment and later referred to by their  $L^*$   
 49 (lightness) value relative to the monitor white point: 23.93, 38.01, 50.83, 61.99, 78.19, respectively).  
 50 Participants repeated the adjustment three times at each luminance level. In addition, each  
 51 participant repeated their matches to the dress body and lace as well as completing three  
 52 illumination matches. All matching procedures followed the same protocol as the main experiment.

### 53 *Results*

54 CIELUV  $v^*$  values of the achromatic settings differed significantly across the different luminance  
 55 levels (Figure S1.A; Friedman test,  $\chi^2(4) = 17.257, p = 0.002$ ). Achromatic settings became bluer

56 as luminance increased, with significantly lower  $v^*$  values at a luminance setting of  $34.46 \text{ cd/m}^2$   
 57 ( $L^* = 50.83$ ) compared to  $7.35 \text{ cd/m}^2$  ( $L^* = 23.93$ ) (mean difference of 2.739,  $p = 0.024$ , with a  
 58 Bonferroni correction). However, CIELUV  $u^*$  settings did not differ significantly (Figure S1.B;  
 59 Friedman test,  $\chi^2(4) = 3.886, p = 0.422$ ).

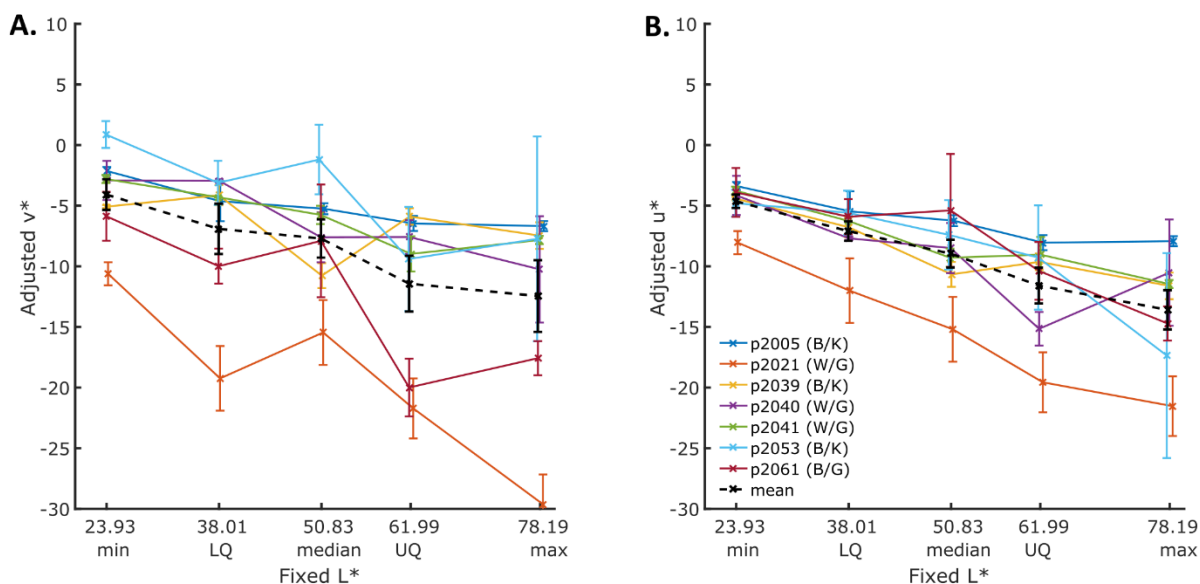

Figure S1. The chromaticity of the achromatic settings in the control experiment. A. CIELUV  $u^*$  values of the achromatic settings across the different luminance levels, in  $L^*$  units. B. CIELUV  $v^*$  values of the achromatic settings across the different luminance levels. In both figures, each participant's matches are plotted separately (solid coloured lines) as well as the average over all participants (black dashed line). The legend shows which participants took part in the control experiment and whether they were categorised in the blue and black (B/K), white and gold (W/G) or blue and gold (B/G) original dress colour names groups.

60  
 61 The matches that participants gave to the dress body and lace did not differ significantly from their  
 62 original matches along any dimension of CIELUV (Figures S2.A and S2.C; Wilcoxon Signed Ranks  
 63 Tests,  $p > 0.128$  in all cases). Mean illumination matches also did not differ from original mean  
 64 illumination matches (Figures S2.B and S2.D; Wilcoxon Signed Ranks Tests,  $p > 0.176$  in all cases).

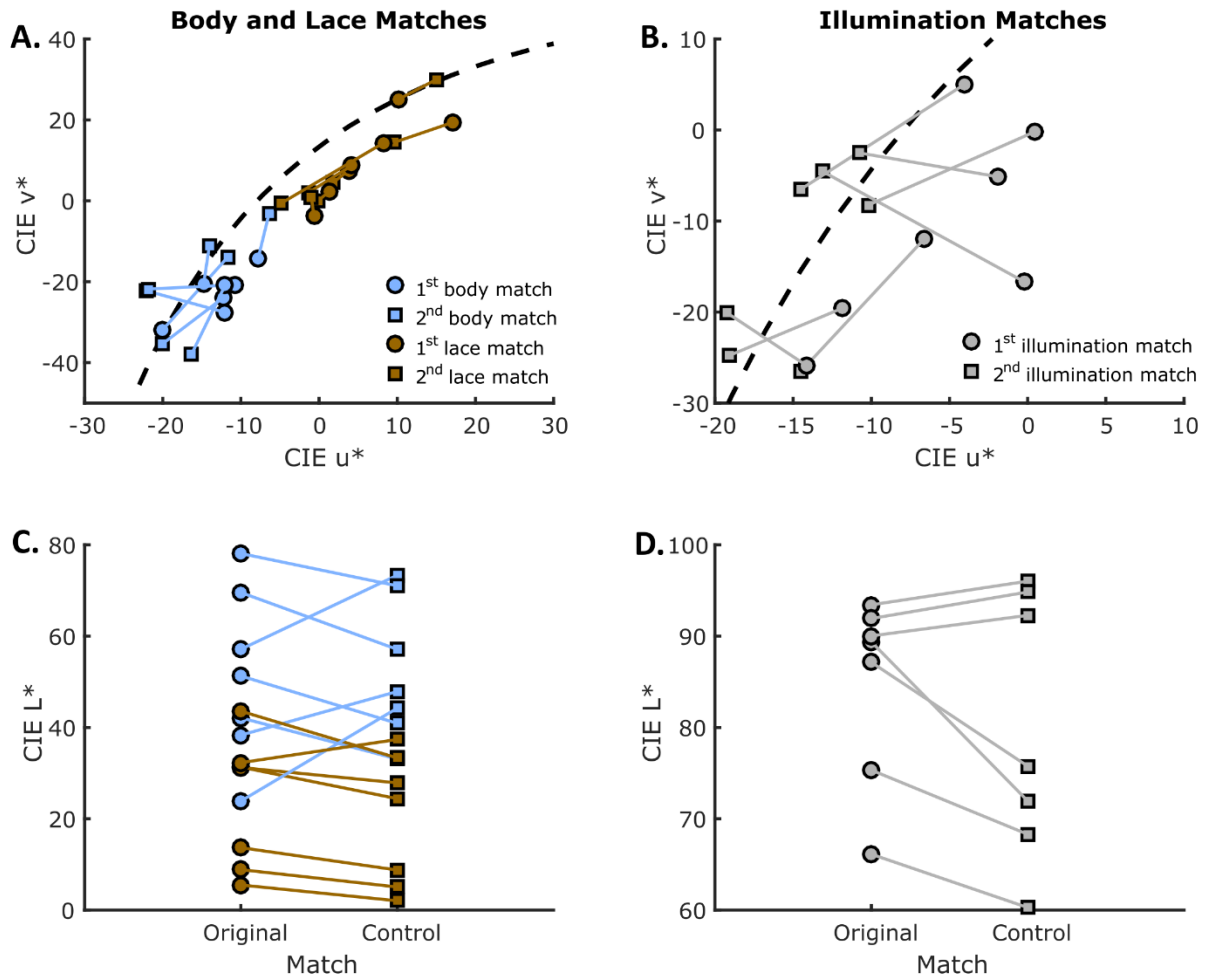

Figure S2. Matches to the dress body, dress lace, and illumination matches made during the control experiment. A. Original dress body (blue o) and lace (brown o) matches and those made during the control experiment (squares) plotted in the CIELUV chromaticity plane. B. Original illumination matches (o) and illumination matches made during the control experiment (squares) plotted in the CIELUV chromaticity plane. C. Original dress body (blue o) and lace (brown o) match luminance settings and the luminance settings of the matches made during the control experiment (squares). D. Original illumination match luminance settings (o) and the luminance settings of matches made during the control experiment. In A and B, the black dashed line represents the Planckian locus.

65
